# Supplementary material for: Brief Communication: Evaluation and comparisons of permafrostmap over Qinghai-Tibet Plateau based on inventory of in-situevidence
Source: Copernicus journal article supplement (doi:10.5194/tc-2018-190), 2018-09-18
Supplement: Supplementary file 1 [file tc-2018-190-supplement.zip]

| NO. | ReferenceID             | FullReference                                                                                                                                                                                                                                                                                                          |
|-----|-------------------------|------------------------------------------------------------------------------------------------------------------------------------------------------------------------------------------------------------------------------------------------------------------------------------------------------------------------|
| 1   | GTN-P Borehole Data     | GTN-P Borehole Data ( <a href="http://gtnpdatabase.org/boreholes">http://gtnpdatabase.org/boreholes</a> )                                                                                                                                                                                                              |
| 2   | GTN-P Active Layer Data | GTN-P Active Layer Data ( <a href="http://gtnpdatabase.org/sites/view/83/">http://gtnpdatabase.org/sites/view/83/</a> )                                                                                                                                                                                                |
| 3   | CMA                     | China Meteorological Administration ( <a href="http://cdc.cma.gov.cn/">http://cdc.cma.gov.cn/</a> )                                                                                                                                                                                                                    |
| 4   | TPEDB                   | Third Pole Environment Database ( <a href="http://en.tpedatabase.cn/">http://en.tpedatabase.cn/</a> )                                                                                                                                                                                                                  |
| 5   | TSP Borehole Inventory  | TSP Borehole Inventory ( <a href="http://www.gtnp.org">www.gtnp.org</a> )                                                                                                                                                                                                                                              |
| 6   | HiWATER                 | Heihe Watershed Allied Telemetry Experimental Research ( <a href="http://westdc.westgis.ac.cn/hiwater/hmon2016">http://westdc.westgis.ac.cn/hiwater/hmon2016</a> )                                                                                                                                                     |
| 7   | Tibet-OBS               | Su, Z., Wen, J., Dente, L., Velde, R., Wang, L., Ma, Y., Yang, K., Hu, Z. (2011): The Tibetan Plateau observatory of plateau scale soil moisture and soil temperature (Tibet-Obs) for quantifying uncertainties in coarse resolution satellite and model products, 15(7): 2303-2316, doi: 10.5194/hess-15-2303-2011    |
| 8   | li2016sgs               | Li, J., Sheng, Y., Wu, J., Feng, Z., Ning, Z., Hu, X., Zhang, X. (2015): Mapping Frozen Soil Distribution and Modeling Permafrost Stability in the Source Area of the Yellow River, Scientia Geographica Sinica, 36(4): 588–596, doi: 10.13249/j.cnki.sgs.2016.04.013                                                  |
| 9   | cao2018jgr              | Cao, B., Zhang, T., Peng, X., Mu, C., Wang, Q., Wang, K., Zhong, X. (2018), Thermal Characteristics and Recent Changes of Permafrost in the Upper Reaches of the Heihe River Basin, Western China, Journal of Geophysical Research: Atmospheres.                                                                       |
| 10  | jin2010jgg              | Jin, H., Wang, S., Lv, L., He, R., Chang, X., Luo, D., (2010), Features and Degradation of Frozen Ground in the Sources Area of the Yellow River, China, Journal of Glaciology and Geocryology, 32(1): 10-17.                                                                                                          |
| 11  | jin2012sgs              | Luo, D., Jin, H., Lin, L., He, R., Yang, S., Chang, X. (2012), New Progress on Permafrost Temperature and Thickness in the Source Area of the Huanghe River, Scientia Geographica Sinica, 32(7): 898-904.                                                                                                              |
| 12  | ldlPhdThesis            | Luo, D., (2012) Monitoring, mapping and modeling of permafrost and active layer processes in the Sources Areas of the Yellow River (SAYR) on Northeastern Qinghai-Tibet Plateau.                                                                                                                                       |
| 13  | lin2015ppp              | Lin, Z., Burn, C., Niu, F., Luo, J., Liu, M., Yin, G. (2015), The thermal regime, including a reversed thermal offset, of Arid Permafrost Sites with Variations in Vegetation Cover Density, Wudaoliang Basin, Qinghai-Tibet Plateau, Permafrost and Periglacial Processes, 26(2): 142-159, doi: 10.1002/ppp.1840      |
| 14  | liu2016jgg              | Liu, G., Zhao, L., Xie, C., Pang, Q., Du, E., Qiao, Y. (2016): Variation characteristics and impact factors of the depth of zero annual amplitude of ground temperature in permafrost regions on the Tibetan Plateau, Journal of Glaciology and Geocryology, 38(5): 1189-1200, doi: 10.7522/j.issn.1000-0240.2016.0139 |
| 15  | pang2006jgg             | Pang, Q., Li, S., Wu, T., Zhang, W. (2006): Simulated Distribution of Active Layer Depths in the Frozen Ground Regions of Tibetan Plateau, Journal of Glaciology and Geocryology, 28(3): 390-395.                                                                                                                      |

|    |               |                                                                                                                                                                                                                                                                                                                                   |
|----|---------------|-----------------------------------------------------------------------------------------------------------------------------------------------------------------------------------------------------------------------------------------------------------------------------------------------------------------------------------|
| 16 | syc2016tcd    | Chen, S., Liu, W., Zhao, Q., Zhao, L., Wu, Q., Lu, X., Kang, S., Qin, X., Chen, S., Ren, J., Qin, D. (2016): Response of freeze-thaw processes to experimental warming in the permafrost regions of the central Qinghai-Tibet Plateau, <i>The Cryosphere Discussions</i> , doi:10.5194/tc-2016-80                                 |
| 17 | wu2007ajgg    | Wu, J., Sheng, Y., Yu, H., Li, J. (2007): Permafrost in the Middle-East Section of Qilian Mountains (I): Distribution of permafrost, <i>Journal of Glaciology and Geocryology</i> , 29(3): 418-425.                                                                                                                               |
| 18 | wu2007bjgg    | Wu, J., Sheng, Y., Yu, H., Li, J. (2007): Permafrost in the Middle-East Section of Qilian Mountains (II): Characters of permafrost, <i>Journal of Glaciology and Geocryology</i> , 29(3): 426-432.                                                                                                                                |
| 19 | wu2008ags     | Wu, J., Sheng, Y., Li, J., Wang, J. (2009): Permafrost in Source Areas of Shule River In Qilian Mountains, <i>Acta Geographica Sinica</i> , 64(5): 571-580.                                                                                                                                                                       |
| 20 | wj2010        | Wu, J., Sheng, Y., Wu, Q., Wen, Z. (2010): Processes and modes of permafrost degradation on the Qinghai-Tibet Plateau, <i>Science China Earth Sciences</i> , 53(1): 150-158, doi: 10.1007/s11430-009-0198-5                                                                                                                       |
| 21 | wu2008jgr     | Wu, Q., Zhang, T. (2008): Recent permafrost warming on the Qinghai-Tibetan Plateau, <i>Journal of Geophysical Research</i> , 113, D13108, doi:10.1029/2007JD009539                                                                                                                                                                |
| 22 | wu2012tc      | Wu, Q., Zhang, T., Liu, Y. (2012): Thermal state of the active layer and permafrost along the Qinghai-Xizang (Tibet) Railway from 2006 to 2010, <i>The Cryosphere</i> , 6(3): 607-612, doi:10.5194/tc-6-607-2012                                                                                                                  |
| 23 | wu2016tc      | Wu, Q., Zhang, Z., Gao, S., Ma, W. (2016): Thermal impacts of engineering activities and vegetation layer on permafrost in different alpine ecosystems of the Qinghai-Tibet Plateau, China, <i>The Cryosphere</i> , 10(4): 1695-1706, doi: 10.5194/tc-10-1695-2016                                                                |
| 24 | zou2017tc     | Zou, D., Zhao, L., Sheng, Y., Chen, J., Hu, G., Wu, T., Wu, J., Xie, C., Wu, X., Pang, Q., Wang, W., Du, E., Li, W., Liu, G., Li, J., Qin, Y., Qiao, Y., Wang, Z., Shi, J., Cheng, G. (2017): A new map of permafrost distribution on the Tibetan Plateau, <i>The Cryosphere</i> , 11(6): 2527-2542, doi: 10.5194/tc-11-2527-2017 |
| 25 | cao2017jgr    | Cao, B., Gruber, S., Zhang, T., Li, L., Peng, X., Wang, K., Zheng, L., Shao, W., Guo, H. (2017): Spatial variability of active layer thickness detected by ground-penetrating radar in the Qilian Mountains, Western China, <i>Journal of Geophysical Research: Earth Surface</i> , 122(3): 574-591                               |
| 26 | chenji2016tcd | Chen, J., Sheng, Y., Wu, Q., Zhao, L., Li, J., Zhao, J. (2016): Effects of Seasonal Snow Cover on Hydrothermal Conditions of the Active Layer in the Northeastern Qinghai-Tibet Plateau, <i>The Cryosphere Discussion</i> , doi: 10.5194/tc-2016-134, 2016                                                                        |

|    |             |                                                                                                                                                                                                                                                                                                          |
|----|-------------|----------------------------------------------------------------------------------------------------------------------------------------------------------------------------------------------------------------------------------------------------------------------------------------------------------|
| 27 | wang2011jgg | Wang, J., Ye, B., Zhang, S., Li, J., Wu, J., Zhou, Z. (2011): Changing Features of CO <sub>2</sub> Fluxes in Alpine Meadow in the Upper Reaches of Shule River, Qilian Shan, Journal of Glaciology and Geocryology, 33(3): 646-653.                                                                      |
| 28 | yue2015jgg  | Yue, G., Zhao, L., Wang, Z., Zou, D., Zhang, L., Qiao, Y., Zhao, Y., Niu, L.(2015): Relationship between alpine meadow root distribution and active layer temperature variation in permafrost areas, Journal of Glaciology and Geocryology, 37(5): 1381-1387, doi: 10.7522/j.isnn.1000-0240.2015.0152    |
| 29 | CTP-SMTMN   | Yang, K., Qin, J., Zhao, L., Chen, Y., Tang, W., Han, M., La, Z., Chen, Z., Lv, N., Ding, B., Wu, H., Lin, C. (2013): A Multiscale Soil Moisture and Freeze–Thaw Monitoring Network on the Third Pole, Bulletin of the American Meteorological Society, 94(12): 1907-1916, doi:10.1175/BAMS-D-12-00203.1 |
