# Supplementary material for: Brief Communication: Evaluation and comparisons of permafrostmap over Qinghai-Tibet Plateau based on inventory of in-situevidence
Source: Copernicus journal article supplement (doi:10.5194/tc-2018-190), 2018-09-18
Supplement: Supplementary file 2 [file tc-2018-190-supplement.zip]

# Permafrost Presence and Absence Inventory over the Qinghai-Tibet Plateau

| No. | ID          | Lat   | Lon   | Ele  | Asp | Slp | PFYN | Year | Method | ReferenceID |
|-----|-------------|-------|-------|------|-----|-----|------|------|--------|-------------|
| 1   | ALT_YNG_10  | 38.80 | 98.77 | 4002 | 339 | 5   | Y    | 2014 | GPR    | cao2017jgr  |
| 2   | ALT_YNG_100 | 38.94 | 98.96 | 4066 | 76  | 10  | Y    | 2014 | GPR    | cao2017jgr  |
| 3   | ALT_YNG_102 | 38.93 | 98.96 | 4051 | 96  | 10  | Y    | 2014 | GPR    | cao2017jgr  |
| 4   | ALT_YNG_103 | 38.93 | 98.96 | 4033 | 97  | 13  | Y    | 2014 | GPR    | cao2017jgr  |
| 5   | ALT_YNG_104 | 38.93 | 98.96 | 4025 | 180 | 3   | Y    | 2014 | GPR    | cao2017jgr  |
| 6   | ALT_YNG_105 | 38.92 | 98.96 | 4016 | 316 | 6   | Y    | 2014 | GPR    | cao2017jgr  |
| 7   | ALT_YNG_106 | 38.92 | 98.96 | 4011 | 87  | 8   | Y    | 2014 | GPR    | cao2017jgr  |
| 8   | ALT_YNG_107 | 38.92 | 98.96 | 3999 | 93  | 6   | Y    | 2014 | GPR    | cao2017jgr  |
| 9   | ALT_YNG_108 | 38.92 | 98.95 | 3986 | 208 | 9   | Y    | 2014 | GPR    | cao2017jgr  |
| 10  | ALT_YNG_109 | 38.91 | 98.96 | 3973 | 154 | 9   | Y    | 2014 | GPR    | cao2017jgr  |
| 11  | ALT_YNG_11  | 38.80 | 98.77 | 3991 | 105 | 9   | Y    | 2014 | GPR    | cao2017jgr  |
| 12  | ALT_YNG_110 | 38.91 | 98.96 | 3966 | 92  | 9   | Y    | 2014 | GPR    | cao2017jgr  |
| 13  | ALT_YNG_111 | 38.91 | 98.96 | 3948 | 77  | 7   | Y    | 2014 | GPR    | cao2017jgr  |
| 14  | ALT_YNG_112 | 38.91 | 98.96 | 3934 | 53  | 9   | Y    | 2014 | GPR    | cao2017jgr  |
| 15  | ALT_YNG_113 | 38.90 | 98.96 | 3970 | 325 | 1   | Y    | 2014 | GPR    | cao2017jgr  |
| 16  | ALT_YNG_114 | 38.91 | 98.96 | 3961 | 104 | 5   | Y    | 2014 | GPR    | cao2017jgr  |
| 17  | ALT_YNG_115 | 38.90 | 98.95 | 3982 | 135 | 5   | Y    | 2014 | GPR    | cao2017jgr  |
| 18  | ALT_YNG_116 | 38.90 | 98.95 | 3964 | 220 | 11  | Y    | 2014 | GPR    | cao2017jgr  |
| 19  | ALT_YNG_117 | 38.90 | 98.95 | 3925 | 120 | 4   | Y    | 2014 | GPR    | cao2017jgr  |
| 20  | ALT_YNG_118 | 38.89 | 98.95 | 3904 | 139 | 6   | Y    | 2014 | GPR    | cao2017jgr  |
| 21  | ALT_YNG_119 | 38.89 | 98.95 | 3894 | 140 | 2   | Y    | 2014 | GPR    | cao2017jgr  |
| 22  | ALT_YNG_120 | 38.89 | 98.95 | 3887 | 96  | 9   | Y    | 2014 | GPR    | cao2017jgr  |
| 23  | ALT_YNG_121 | 38.88 | 98.94 | 3867 | 97  | 2   | Y    | 2014 | GPR    | cao2017jgr  |
| 24  | ALT_YNG_122 | 38.87 | 98.94 | 3834 | 145 | 2   | Y    | 2014 | GPR    | cao2017jgr  |
| 25  | ALT_YNG_123 | 38.87 | 98.94 | 3828 | 109 | 4   | Y    | 2014 | GPR    | cao2017jgr  |
| 26  | ALT_YNG_124 | 38.86 | 98.94 | 3821 | 104 | 3   | Y    | 2014 | GPR    | cao2017jgr  |
| 27  | ALT_YNG_125 | 38.86 | 98.94 | 3811 | 281 | 4   | Y    | 2014 | GPR    | cao2017jgr  |
| 28  | ALT_YNG_126 | 38.85 | 98.94 | 3809 | 21  | 4   | Y    | 2014 | GPR    | cao2017jgr  |
| 29  | ALT_YNG_127 | 38.85 | 98.94 | 3793 | 346 | 2   | Y    | 2014 | GPR    | cao2017jgr  |
| 30  | ALT_YNG_128 | 38.84 | 98.94 | 3792 | 78  | 7   | Y    | 2014 | GPR    | cao2017jgr  |
| 31  | ALT_YNG_129 | 38.63 | 98.95 | 4099 | 81  | 10  | Y    | 2014 | GPR    | cao2017jgr  |
| 32  | ALT_YNG_13  | 38.80 | 98.78 | 3974 | 12  | 7   | Y    | 2014 | GPR    | cao2017jgr  |
| 33  | ALT_YNG_130 | 38.63 | 98.95 | 4100 | 52  | 15  | Y    | 2014 | GPR    | cao2017jgr  |
| 34  | ALT_YNG_131 | 38.63 | 98.95 | 4078 | 47  | 12  | Y    | 2014 | GPR    | cao2017jgr  |
| 35  | ALT_YNG_132 | 38.64 | 98.95 | 4063 | 95  | 9   | Y    | 2014 | GPR    | cao2017jgr  |
| 36  | ALT_YNG_133 | 38.64 | 98.95 | 4030 | 79  | 16  | Y    | 2014 | GPR    | cao2017jgr  |
| 37  | ALT_YNG_134 | 38.64 | 98.95 | 4003 | 102 | 11  | Y    | 2014 | GPR    | cao2017jgr  |
| 38  | ALT_YNG_135 | 38.65 | 98.96 | 3954 | 111 | 12  | Y    | 2014 | GPR    | cao2017jgr  |
| 39  | ALT_YNG_136 | 38.65 | 98.96 | 3932 | 307 | 9   | Y    | 2014 | GPR    | cao2017jgr  |
| 40  | ALT_YNG_137 | 38.65 | 98.96 | 3909 | 283 | 10  | Y    | 2014 | GPR    | cao2017jgr  |
| 41  | ALT_YNG_138 | 38.66 | 98.96 | 3896 | 102 | 23  | Y    | 2014 | GPR    | cao2017jgr  |
| 42  | ALT_YNG_139 | 38.66 | 98.96 | 3893 | 96  | 12  | Y    | 2014 | GPR    | cao2017jgr  |
| 43  | ALT_YNG_14  | 38.81 | 98.78 | 3988 | 93  | 7   | Y    | 2014 | GPR    | cao2017jgr  |

|    |             |       |       |      |     |    |   |      |     |            |
|----|-------------|-------|-------|------|-----|----|---|------|-----|------------|
| 44 | ALT_YNG_140 | 38.66 | 98.96 | 3889 | 105 | 9  | Y | 2014 | GPR | cao2017jgr |
| 45 | ALT_YNG_141 | 38.66 | 98.96 | 3890 | 93  | 9  | Y | 2014 | GPR | cao2017jgr |
| 46 | ALT_YNG_142 | 38.67 | 98.96 | 3886 | 76  | 5  | Y | 2014 | GPR | cao2017jgr |
| 47 | ALT_YNG_144 | 38.81 | 98.78 | 3980 | 125 | 2  | Y | 2014 | GPR | cao2017jgr |
| 48 | ALT_YNG_145 | 38.84 | 98.85 | 3831 | 301 | 2  | Y | 2014 | GPR | cao2017jgr |
| 49 | ALT_YNG_146 | 38.83 | 98.95 | 3773 | 94  | 6  | Y | 2014 | GPR | cao2017jgr |
| 50 | ALT_YNG_147 | 38.81 | 99.03 | 3692 | 229 | 3  | Y | 2014 | GPR | cao2017jgr |
| 51 | ALT_YNG_148 | 38.96 | 98.96 | 4159 | 135 | 15 | Y | 2014 | GPR | cao2017jgr |
| 52 | ALT_YNG_149 | 38.63 | 98.95 | 4138 | 181 | 4  | Y | 2014 | GPR | cao2017jgr |
| 53 | ALT_YNG_15  | 38.81 | 98.78 | 3972 | 80  | 5  | Y | 2014 | GPR | cao2017jgr |
| 54 | ALT_YNG_150 | 38.79 | 99.07 | 3681 | 183 | 2  | Y | 2014 | GPR | cao2017jgr |
| 55 | ALT_YNG_16  | 38.82 | 98.78 | 3954 | 57  | 4  | Y | 2014 | GPR | cao2017jgr |
| 56 | ALT_YNG_17  | 38.82 | 98.79 | 3945 | 65  | 3  | Y | 2014 | GPR | cao2017jgr |
| 57 | ALT_YNG_18  | 38.82 | 98.79 | 3940 | 73  | 1  | Y | 2014 | GPR | cao2017jgr |
| 58 | ALT_YNG_19  | 38.82 | 98.80 | 3929 | 123 | 3  | Y | 2014 | GPR | cao2017jgr |
| 59 | ALT_YNG_20  | 38.82 | 98.80 | 3931 | 330 | 5  | Y | 2014 | GPR | cao2017jgr |
| 60 | ALT_YNG_21  | 38.83 | 98.80 | 3916 | 185 | 2  | Y | 2014 | GPR | cao2017jgr |
| 61 | ALT_YNG_22  | 38.83 | 98.81 | 3906 | 78  | 3  | Y | 2014 | GPR | cao2017jgr |
| 62 | ALT_YNG_23  | 38.83 | 98.81 | 3897 | 27  | 3  | Y | 2014 | GPR | cao2017jgr |
| 63 | ALT_YNG_24  | 38.83 | 98.82 | 3892 | 139 | 3  | Y | 2014 | GPR | cao2017jgr |
| 64 | ALT_YNG_25  | 38.83 | 98.82 | 3891 | 122 | 6  | Y | 2014 | GPR | cao2017jgr |
| 65 | ALT_YNG_26  | 38.83 | 98.82 | 3884 | 114 | 2  | Y | 2014 | GPR | cao2017jgr |
| 66 | ALT_YNG_27  | 38.83 | 98.83 | 3876 | 113 | 3  | Y | 2014 | GPR | cao2017jgr |
| 67 | ALT_YNG_28  | 38.83 | 98.83 | 3861 | 228 | 2  | Y | 2014 | GPR | cao2017jgr |
| 68 | ALT_YNG_29  | 38.83 | 98.83 | 3868 | 304 | 4  | Y | 2014 | GPR | cao2017jgr |
| 69 | ALT_YNG_30  | 38.84 | 98.84 | 3851 | 79  | 5  | Y | 2014 | GPR | cao2017jgr |
| 70 | ALT_YNG_31  | 38.84 | 98.84 | 3840 | 90  | 0  | Y | 2014 | GPR | cao2017jgr |
| 71 | ALT_YNG_32  | 38.83 | 98.85 | 3834 | 333 | 2  | Y | 2014 | GPR | cao2017jgr |
| 72 | ALT_YNG_33  | 38.83 | 98.85 | 3839 | 350 | 3  | Y | 2014 | GPR | cao2017jgr |
| 73 | ALT_YNG_34  | 38.84 | 98.86 | 3833 | 239 | 5  | Y | 2014 | GPR | cao2017jgr |
| 74 | ALT_YNG_35  | 38.84 | 98.87 | 3824 | 280 | 1  | Y | 2014 | GPR | cao2017jgr |
| 75 | ALT_YNG_36  | 38.84 | 98.87 | 3823 | 28  | 6  | Y | 2014 | GPR | cao2017jgr |
| 76 | ALT_YNG_37  | 38.84 | 98.88 | 3814 | 325 | 5  | Y | 2014 | GPR | cao2017jgr |
| 77 | ALT_YNG_38  | 38.84 | 98.88 | 3812 | 60  | 3  | Y | 2014 | GPR | cao2017jgr |
| 78 | ALT_YNG_39  | 38.84 | 98.88 | 3803 | 360 | 3  | Y | 2014 | GPR | cao2017jgr |
| 79 | ALT_YNG_4   | 38.79 | 98.76 | 4043 | 34  | 1  | Y | 2014 | GPR | cao2017jgr |
| 80 | ALT_YNG_40  | 38.84 | 98.89 | 3796 | 352 | 1  | Y | 2014 | GPR | cao2017jgr |
| 81 | ALT_YNG_41  | 38.84 | 98.89 | 3783 | 52  | 6  | Y | 2014 | GPR | cao2017jgr |
| 82 | ALT_YNG_42  | 38.85 | 98.90 | 3779 | 347 | 1  | Y | 2014 | GPR | cao2017jgr |
| 83 | ALT_YNG_43  | 38.85 | 98.90 | 3778 | 164 | 4  | Y | 2014 | GPR | cao2017jgr |
| 84 | ALT_YNG_44  | 38.85 | 98.90 | 3780 | 238 | 6  | Y | 2014 | GPR | cao2017jgr |
| 85 | ALT_YNG_45  | 38.84 | 98.91 | 3787 | 191 | 3  | Y | 2014 | GPR | cao2017jgr |
| 86 | ALT_YNG_46  | 38.84 | 98.91 | 3787 | 212 | 3  | Y | 2014 | GPR | cao2017jgr |
| 87 | ALT_YNG_47  | 38.84 | 98.91 | 3786 | 31  | 2  | Y | 2014 | GPR | cao2017jgr |
| 88 | ALT_YNG_48  | 38.84 | 98.92 | 3783 | 130 | 4  | Y | 2014 | GPR | cao2017jgr |
| 89 | ALT_YNG_49  | 38.84 | 98.93 | 3786 | 171 | 2  | Y | 2014 | GPR | cao2017jgr |
| 90 | ALT_YNG_5   | 38.79 | 98.76 | 4037 | 324 | 7  | Y | 2014 | GPR | cao2017jgr |

|     |            |       |       |      |     |    |   |      |     |            |
|-----|------------|-------|-------|------|-----|----|---|------|-----|------------|
| 91  | ALT_YNG_50 | 38.84 | 98.93 | 3786 | 63  | 3  | Y | 2014 | GPR | cao2017jgr |
| 92  | ALT_YNG_51 | 38.84 | 98.93 | 3783 | 194 | 5  | Y | 2014 | GPR | cao2017jgr |
| 93  | ALT_YNG_52 | 38.84 | 98.94 | 3778 | 268 | 4  | Y | 2014 | GPR | cao2017jgr |
| 94  | ALT_YNG_53 | 38.84 | 98.94 | 3788 | 214 | 2  | Y | 2014 | GPR | cao2017jgr |
| 95  | ALT_YNG_54 | 38.84 | 98.95 | 3772 | 123 | 3  | Y | 2014 | GPR | cao2017jgr |
| 96  | ALT_YNG_55 | 38.84 | 98.95 | 3773 | 303 | 1  | Y | 2014 | GPR | cao2017jgr |
| 97  | ALT_YNG_56 | 38.83 | 98.96 | 3772 | 50  | 4  | Y | 2014 | GPR | cao2017jgr |
| 98  | ALT_YNG_57 | 38.83 | 98.96 | 3778 | 121 | 2  | Y | 2014 | GPR | cao2017jgr |
| 99  | ALT_YNG_58 | 38.83 | 98.96 | 3764 | 161 | 2  | Y | 2014 | GPR | cao2017jgr |
| 100 | ALT_YNG_59 | 38.83 | 98.97 | 3758 | 282 | 2  | Y | 2014 | GPR | cao2017jgr |
| 101 | ALT_YNG_6  | 38.79 | 98.76 | 4032 | 115 | 5  | Y | 2014 | GPR | cao2017jgr |
| 102 | ALT_YNG_60 | 38.83 | 98.97 | 3756 | 235 | 3  | Y | 2014 | GPR | cao2017jgr |
| 103 | ALT_YNG_61 | 38.83 | 98.97 | 3751 | 4   | 1  | Y | 2014 | GPR | cao2017jgr |
| 104 | ALT_YNG_62 | 38.83 | 98.98 | 3750 | 183 | 4  | Y | 2014 | GPR | cao2017jgr |
| 105 | ALT_YNG_63 | 38.83 | 98.98 | 3744 | 121 | 3  | Y | 2014 | GPR | cao2017jgr |
| 106 | ALT_YNG_64 | 38.83 | 98.98 | 3738 | 334 | 1  | Y | 2014 | GPR | cao2017jgr |
| 107 | ALT_YNG_65 | 38.82 | 98.99 | 3735 | 269 | 4  | Y | 2014 | GPR | cao2017jgr |
| 108 | ALT_YNG_66 | 38.82 | 98.99 | 3735 | 150 | 2  | Y | 2014 | GPR | cao2017jgr |
| 109 | ALT_YNG_67 | 38.82 | 98.99 | 3728 | 146 | 3  | Y | 2014 | GPR | cao2017jgr |
| 110 | ALT_YNG_68 | 38.82 | 99.00 | 3723 | 196 | 4  | Y | 2014 | GPR | cao2017jgr |
| 111 | ALT_YNG_69 | 38.82 | 99.00 | 3721 | 157 | 2  | Y | 2014 | GPR | cao2017jgr |
| 112 | ALT_YNG_7  | 38.79 | 98.77 | 4022 | 275 | 2  | Y | 2014 | GPR | cao2017jgr |
| 113 | ALT_YNG_70 | 38.82 | 99.00 | 3719 | 217 | 1  | Y | 2014 | GPR | cao2017jgr |
| 114 | ALT_YNG_71 | 38.82 | 99.00 | 3717 | 224 | 5  | Y | 2014 | GPR | cao2017jgr |
| 115 | ALT_YNG_72 | 38.82 | 99.01 | 3717 | 161 | 1  | Y | 2014 | GPR | cao2017jgr |
| 116 | ALT_YNG_73 | 38.81 | 99.01 | 3709 | 163 | 2  | Y | 2014 | GPR | cao2017jgr |
| 117 | ALT_YNG_74 | 38.81 | 99.02 | 3703 | 104 | 4  | Y | 2014 | GPR | cao2017jgr |
| 118 | ALT_YNG_75 | 38.81 | 99.02 | 3703 | 274 | 2  | Y | 2014 | GPR | cao2017jgr |
| 119 | ALT_YNG_76 | 38.81 | 99.02 | 3700 | 133 | 3  | Y | 2014 | GPR | cao2017jgr |
| 120 | ALT_YNG_77 | 38.80 | 99.03 | 3693 | 327 | 3  | Y | 2014 | GPR | cao2017jgr |
| 121 | ALT_YNG_78 | 38.80 | 99.03 | 3689 | 177 | 2  | Y | 2014 | GPR | cao2017jgr |
| 122 | ALT_YNG_79 | 38.80 | 99.04 | 3687 | 197 | 4  | Y | 2014 | GPR | cao2017jgr |
| 123 | ALT_YNG_8  | 38.79 | 98.77 | 4017 | 91  | 5  | Y | 2014 | GPR | cao2017jgr |
| 124 | ALT_YNG_80 | 38.80 | 99.04 | 3686 | 253 | 4  | Y | 2014 | GPR | cao2017jgr |
| 125 | ALT_YNG_81 | 38.80 | 99.04 | 3691 | 216 | 3  | Y | 2014 | GPR | cao2017jgr |
| 126 | ALT_YNG_82 | 38.80 | 99.04 | 3697 | 119 | 2  | Y | 2014 | GPR | cao2017jgr |
| 127 | ALT_YNG_83 | 38.80 | 99.05 | 3694 | 235 | 2  | Y | 2014 | GPR | cao2017jgr |
| 128 | ALT_YNG_84 | 38.80 | 99.05 | 3696 | 119 | 2  | Y | 2014 | GPR | cao2017jgr |
| 129 | ALT_YNG_85 | 38.80 | 99.06 | 3700 | 231 | 5  | Y | 2014 | GPR | cao2017jgr |
| 130 | ALT_YNG_86 | 38.80 | 99.06 | 3697 | 223 | 2  | Y | 2014 | GPR | cao2017jgr |
| 131 | ALT_YNG_87 | 38.79 | 99.06 | 3691 | 8   | 2  | Y | 2014 | GPR | cao2017jgr |
| 132 | ALT_YNG_88 | 38.79 | 99.07 | 3686 | 17  | 3  | Y | 2014 | GPR | cao2017jgr |
| 133 | ALT_YNG_89 | 38.96 | 98.97 | 4166 | 357 | 2  | Y | 2014 | GPR | cao2017jgr |
| 134 | ALT_YNG_9  | 38.79 | 98.77 | 4010 | 34  | 2  | Y | 2014 | GPR | cao2017jgr |
| 135 | ALT_YNG_90 | 38.96 | 98.96 | 4164 | 130 | 9  | Y | 2014 | GPR | cao2017jgr |
| 136 | ALT_YNG_91 | 38.95 | 98.96 | 4153 | 115 | 13 | Y | 2014 | GPR | cao2017jgr |
| 137 | ALT_YNG_92 | 38.95 | 98.96 | 4139 | 67  | 1  | Y | 2014 | GPR | cao2017jgr |

|     |            |       |        |      |     |    |   |         |     |               |
|-----|------------|-------|--------|------|-----|----|---|---------|-----|---------------|
| 138 | ALT_YNG_93 | 38.95 | 98.96  | 4128 | 320 | 7  | Y | 2014    | GPR | cao2017jgr    |
| 139 | ALT_YNG_94 | 38.95 | 98.96  | 4120 | 159 | 9  | Y | 2014    | GPR | cao2017jgr    |
| 140 | ALT_YNG_95 | 38.95 | 98.96  | 4116 | 107 | 9  | Y | 2014    | GPR | cao2017jgr    |
| 141 | ALT_YNG_96 | 38.95 | 98.96  | 4111 | 103 | 10 | Y | 2014    | GPR | cao2017jgr    |
| 142 | ALT_YNG_97 | 38.94 | 98.96  | 4097 | 67  | 11 | Y | 2014    | GPR | cao2017jgr    |
| 143 | ALT_YNG_98 | 38.94 | 98.96  | 4088 | 94  | 17 | Y | 2014    | GPR | cao2017jgr    |
| 144 | ALT_YNG_99 | 38.94 | 98.96  | 4083 | 92  | 17 | Y | 2014    | GPR | cao2017jgr    |
| 145 | NSS        | 37.70 | 96.52  | 4040 | 294 | 2  | Y | 2009    | SP  | chenji2016tcd |
| 146 | s51804     | 37.77 | 75.23  | 3091 | 90  | 9  | N | 957-201 | GST | CMA           |
| 147 | s51886     | 38.25 | 90.85  | 2945 | 135 | 4  | N | 958-201 | GST | CMA           |
| 148 | s52602     | 38.75 | 93.33  | 2770 | 177 | 9  | N | 956-201 | GST | CMA           |
| 149 | s52633     | 38.80 | 98.42  | 3367 | 33  | 1  | N | 956-201 | GST | CMA           |
| 150 | s52645     | 38.42 | 99.58  | 3320 | 244 | 2  | N | 959-201 | GST | CMA           |
| 151 | s52657     | 38.18 | 100.25 | 2787 | 221 | 3  | N | 956-201 | GST | CMA           |
| 152 | s52707     | 36.80 | 93.68  | 2767 | 101 | 1  | N | 960-201 | GST | CMA           |
| 153 | s52713     | 37.85 | 95.37  | 3173 | 288 | 2  | N | 956-201 | GST | CMA           |
| 154 | s52737     | 37.37 | 97.37  | 2982 | 321 | 2  | N | 955-201 | GST | CMA           |
| 155 | s52754     | 37.33 | 100.13 | 3302 | 265 | 2  | N | 957-201 | GST | CMA           |
| 156 | s52765     | 37.38 | 101.62 | 2850 | 176 | 2  | N | 956-201 | GST | CMA           |
| 157 | s52787     | 37.20 | 102.87 | 3045 | 5   | 6  | N | 951-201 | GST | CMA           |
| 158 | s52818     | 36.42 | 94.90  | 2808 | 266 | 2  | N | 955-201 | GST | CMA           |
| 159 | s52825     | 36.43 | 96.42  | 2790 | 103 | 8  | N | 956-201 | GST | CMA           |
| 160 | s52833     | 36.92 | 98.48  | 2950 | 180 | 1  | N | 980-201 | GST | CMA           |
| 161 | s52836     | 36.30 | 98.10  | 3191 | 231 | 1  | N | 954-201 | GST | CMA           |
| 162 | s52842     | 36.78 | 99.08  | 3088 | 125 | 4  | N | 955-201 | GST | CMA           |
| 163 | s52856     | 36.27 | 100.62 | 2835 | 270 | 6  | N | 953-201 | GST | CMA           |
| 164 | s52866     | 36.72 | 101.75 | 2295 | 289 | 5  | N | 954-201 | GST | CMA           |
| 165 | s52868     | 36.03 | 101.43 | 2237 | 12  | 2  | N | 956-201 | GST | CMA           |
| 166 | s52908     | 35.22 | 93.08  | 4612 | 204 | 7  | N | 956-201 | GST | CMA           |
| 167 | s52943     | 35.58 | 99.98  | 3323 | 142 | 4  | N | 960-201 | GST | CMA           |
| 168 | s52955     | 35.58 | 100.75 | 3203 | 64  | 6  | N | 967-201 | GST | CMA           |
| 169 | s52974     | 35.52 | 102.02 | 2491 | 105 | 2  | N | 957-201 | GST | CMA           |
| 170 | s55228     | 32.50 | 80.08  | 4278 | 97  | 11 | N | 961-201 | GST | CMA           |
| 171 | s55248     | 32.15 | 84.42  | 4415 | 21  | 7  | N | 973-201 | GST | CMA           |
| 172 | s55279     | 31.38 | 90.02  | 4700 | 159 | 7  | N | 956-201 | GST | CMA           |
| 173 | s55294     | 32.35 | 91.10  | 4800 | 169 | 5  | N | 965-201 | GST | CMA           |
| 174 | s55299     | 31.48 | 92.07  | 4507 | 283 | 4  | N | 954-201 | GST | CMA           |
| 175 | s55437     | 30.28 | 81.25  | 3900 | 318 | 40 | N | 973-201 | GST | CMA           |
| 176 | s55472     | 30.95 | 88.63  | 4672 | 212 | 11 | N | 960-201 | GST | CMA           |
| 177 | s55493     | 30.48 | 91.10  | 4200 | 300 | 6  | N | 962-201 | GST | CMA           |
| 178 | s55569     | 29.08 | 87.60  | 4000 | 61  | 26 | N | 977-201 | GST | CMA           |
| 179 | s55578     | 29.25 | 88.88  | 3836 | 33  | 2  | N | 955-201 | GST | CMA           |
| 180 | s55585     | 29.43 | 90.17  | 3809 | 125 | 3  | N | 973-201 | GST | CMA           |
| 181 | s55591     | 29.67 | 91.13  | 3649 | 329 | 2  | N | 955-201 | GST | CMA           |
| 182 | s55598     | 29.25 | 91.77  | 3552 | 252 | 13 | N | 956-201 | GST | CMA           |
| 183 | s55655     | 28.18 | 85.97  | 3810 | 245 | 34 | N | 966-201 | GST | CMA           |
| 184 | s55664     | 28.63 | 87.08  | 4300 | 299 | 19 | N | 959-201 | GST | CMA           |

|     |        |       |        |      |     |    |   |         |     |     |
|-----|--------|-------|--------|------|-----|----|---|---------|-----|-----|
| 185 | s55680 | 28.92 | 89.60  | 4040 | 213 | 6  | N | 956-201 | GST | CMA |
| 186 | s55681 | 28.97 | 90.40  | 4432 | 86  | 7  | N | 961-201 | GST | CMA |
| 187 | s55690 | 27.98 | 91.95  | 4280 | 314 | 17 | N | 967-201 | GST | CMA |
| 188 | s55696 | 28.42 | 92.47  | 3860 | 151 | 11 | N | 959-201 | GST | CMA |
| 189 | s55773 | 27.73 | 89.08  | 4300 | 89  | 15 | N | 956-201 | GST | CMA |
| 190 | s56004 | 34.22 | 92.43  | 4533 | 208 | 3  | N | 956-201 | GST | CMA |
| 191 | s56018 | 32.90 | 95.30  | 4066 | 191 | 32 | N | 956-201 | GST | CMA |
| 192 | s56021 | 34.13 | 95.78  | 4175 | 202 | 9  | N | 956-201 | GST | CMA |
| 193 | s56029 | 33.02 | 97.02  | 3681 | 110 | 25 | N | 951-201 | GST | CMA |
| 194 | s56033 | 34.92 | 98.22  | 4272 | 281 | 4  | N | 953-201 | GST | CMA |
| 195 | s56034 | 33.80 | 97.13  | 4415 | 268 | 2  | N | 956-201 | GST | CMA |
| 196 | s56038 | 32.98 | 98.10  | 4200 | 230 | 28 | N | 960-201 | GST | CMA |
| 197 | s56043 | 34.47 | 100.25 | 3719 | 98  | 5  | N | 959-201 | GST | CMA |
| 198 | s56046 | 33.75 | 99.65  | 3968 | 20  | 2  | N | 956-201 | GST | CMA |
| 199 | s56065 | 34.73 | 101.60 | 3500 | 105 | 7  | N | 959-201 | GST | CMA |
| 200 | s56067 | 33.43 | 101.48 | 3629 | 301 | 1  | N | 958-201 | GST | CMA |
| 201 | s56074 | 34.00 | 102.08 | 3471 | 240 | 2  | N | 967-201 | GST | CMA |
| 202 | s56079 | 33.58 | 102.97 | 3440 | 252 | 4  | N | 957-201 | GST | CMA |
| 203 | s56080 | 35.00 | 102.90 | 2910 | 46  | 14 | N | 957-201 | GST | CMA |
| 204 | s56106 | 31.88 | 93.78  | 4023 | 56  | 16 | N | 956-201 | GST | CMA |
| 205 | s56116 | 31.42 | 95.60  | 3873 | 141 | 5  | N | 954-201 | GST | CMA |
| 206 | s56125 | 32.20 | 96.48  | 3644 | 196 | 2  | N | 956-201 | GST | CMA |
| 207 | s56137 | 31.15 | 97.17  | 3306 | 189 | 25 | N | 954-201 | GST | CMA |
| 208 | s56144 | 31.80 | 98.58  | 3184 | 328 | 25 | N | 956-201 | GST | CMA |
| 209 | s56146 | 31.62 | 100.00 | 3394 | 219 | 4  | N | 951-201 | GST | CMA |
| 210 | s56151 | 32.93 | 100.75 | 3530 | 226 | 37 | N | 960-201 | GST | CMA |
| 211 | s56152 | 32.28 | 100.33 | 3894 | 269 | 14 | N | 961-201 | GST | CMA |
| 212 | s56167 | 30.98 | 101.12 | 2957 | 311 | 0  | N | 957-201 | GST | CMA |
| 213 | s56172 | 31.90 | 102.23 | 2664 | 217 | 36 | N | 953-201 | GST | CMA |
| 214 | s56173 | 32.80 | 102.55 | 3492 | 113 | 4  | N | 960-201 | GST | CMA |
| 215 | s56178 | 31.00 | 102.35 | 2369 | 220 | 9  | N | 951-201 | GST | CMA |
| 216 | s56182 | 32.65 | 103.57 | 2851 | 22  | 22 | N | 951-201 | GST | CMA |
| 217 | s56202 | 30.67 | 93.28  | 4489 | 306 | 25 | N | 954-201 | GST | CMA |
| 218 | s56223 | 30.75 | 95.83  | 3640 | 95  | 13 | N | 979-201 | GST | CMA |
| 219 | s56227 | 29.87 | 95.77  | 2736 | 184 | 11 | N | 955-201 | GST | CMA |
| 220 | s56247 | 30.00 | 99.10  | 2589 | 5   | 11 | N | 952-201 | GST | CMA |
| 221 | s56251 | 30.93 | 100.32 | 3000 | 55  | 14 | N | 959-201 | GST | CMA |
| 222 | s56257 | 30.00 | 100.27 | 3949 | 320 | 9  | N | 952-201 | GST | CMA |
| 223 | s56312 | 29.67 | 94.33  | 2992 | 79  | 6  | N | 954-201 | GST | CMA |
| 224 | s56331 | 29.67 | 97.83  | 3780 | 71  | 19 | N | 978-201 | GST | CMA |
| 225 | s56357 | 29.05 | 100.30 | 3728 | 204 | 24 | N | 957-201 | GST | CMA |
| 226 | s56374 | 30.05 | 101.97 | 2616 | 315 | 22 | N | 951-201 | GST | CMA |
| 227 | s56434 | 28.65 | 97.47  | 2328 | 283 | 37 | N | 969-201 | GST | CMA |
| 228 | s56444 | 28.48 | 98.92  | 3319 | 245 | 8  | N | 953-201 | GST | CMA |
| 229 | s56459 | 27.93 | 101.27 | 2427 | 88  | 10 | N | 959-201 | GST | CMA |
| 230 | s56462 | 29.00 | 101.50 | 2987 | 75  | 33 | N | 952-201 | GST | CMA |
| 231 | s56533 | 27.75 | 98.67  | 1583 | 232 | 37 | N | 958-201 | GST | CMA |

|     |        |       |       |      |     |    |   |         |     |           |
|-----|--------|-------|-------|------|-----|----|---|---------|-----|-----------|
| 232 | s56543 | 27.83 | 99.70 | 3276 | 150 | 5  | N | 958-201 | GST | CMA       |
| 233 | BC+    | 31.37 | 91.98 | 4559 | 325 | 2  | N | 2013    | GST | CTP-SMTMN |
| 234 | BC02   | 31.07 | 92.37 | 4835 | 226 | 9  | N | 012-201 | GST | CTP-SMTMN |
| 235 | BC03   | 31.11 | 92.31 | 4690 | 251 | 6  | N | 011-201 | GST | CTP-SMTMN |
| 236 | BC04   | 31.13 | 92.25 | 4609 | 281 | 4  | N | 011-201 | GST | CTP-SMTMN |
| 237 | BC05   | 31.17 | 92.20 | 4548 | 40  | 8  | N | 011-201 | GST | CTP-SMTMN |
| 238 | BC06   | 31.23 | 92.16 | 4491 | 127 | 2  | N | 011-201 | GST | CTP-SMTMN |
| 239 | BC07   | 31.27 | 92.11 | 4478 | 280 | 8  | N | 011-201 | GST | CTP-SMTMN |
| 240 | BC08   | 31.33 | 92.04 | 4470 | 39  | 13 | N | 011-201 | GST | CTP-SMTMN |
| 241 | C1     | 31.68 | 91.77 | 4647 | 82  | 5  | N | 012-201 | GST | CTP-SMTMN |
| 242 | C2     | 31.69 | 91.81 | 4672 | 219 | 7  | N | 012-201 | GST | CTP-SMTMN |
| 243 | C3     | 31.61 | 91.77 | 4585 | 91  | 8  | N | 2014    | GST | CTP-SMTMN |
| 244 | C4     | 31.62 | 91.84 | 4608 | 114 | 7  | N | 2014    | GST | CTP-SMTMN |
| 245 | CD01   | 31.71 | 92.46 | 4762 | 137 | 3  | N | 011-201 | GST | CTP-SMTMN |
| 246 | CD02   | 31.68 | 92.41 | 4612 | 249 | 2  | N | 011-201 | GST | CTP-SMTMN |
| 247 | CD03   | 31.66 | 92.34 | 4518 | 47  | 8  | N | 011-201 | GST | CTP-SMTMN |
| 248 | CD04   | 31.64 | 92.33 | 4491 | 228 | 5  | N | 2011    | GST | CTP-SMTMN |
| 249 | CD05   | 31.59 | 92.24 | 4637 | 142 | 5  | N | 011-201 | GST | CTP-SMTMN |
| 250 | CD06   | 31.54 | 92.21 | 4769 | 17  | 8  | N | 011-201 | GST | CTP-SMTMN |
| 251 | CD07   | 31.50 | 92.13 | 4628 | 343 | 7  | N | 2014    | GST | CTP-SMTMN |
| 252 | F1     | 31.69 | 91.80 | 4699 | 280 | 7  | N | 013-201 | GST | CTP-SMTMN |
| 253 | F2     | 31.70 | 91.79 | 4697 | 8   | 6  | N | 013-201 | GST | CTP-SMTMN |
| 254 | F3     | 31.72 | 91.80 | 4699 | 232 | 3  | N | 013-201 | GST | CTP-SMTMN |
| 255 | F4     | 31.70 | 91.77 | 4737 | 157 | 15 | N | 013-201 | GST | CTP-SMTMN |
| 256 | F5     | 31.69 | 91.79 | 4719 | 205 | 5  | N | 013-201 | GST | CTP-SMTMN |
| 257 | MS3475 | 31.95 | 91.72 | 4637 | 121 | 16 | N | 011-201 | GST | CTP-SMTMN |
| 258 | MS3482 | 31.89 | 91.70 | 4713 | 270 | 15 | N | 011-201 | GST | CTP-SMTMN |
| 259 | MS3488 | 31.84 | 91.71 | 4799 | 260 | 9  | N | 011-201 | GST | CTP-SMTMN |
| 260 | MS3494 | 31.81 | 91.75 | 4818 | 209 | 10 | N | 011-201 | GST | CTP-SMTMN |
| 261 | MS3501 | 31.75 | 91.78 | 4723 | 265 | 2  | N | 011-201 | GST | CTP-SMTMN |
| 262 | MS3506 | 31.72 | 91.81 | 4684 | 49  | 8  | N | 012-201 | GST | CTP-SMTMN |
| 263 | MS3513 | 31.68 | 91.84 | 4628 | 202 | 3  | N | 011-201 | GST | CTP-SMTMN |
| 264 | MS3518 | 31.66 | 91.79 | 4574 | 252 | 2  | N | 011-201 | GST | CTP-SMTMN |
| 265 | MS3523 | 31.64 | 91.75 | 4570 | 118 | 11 | N | 011-201 | GST | CTP-SMTMN |
| 266 | MS3527 | 31.61 | 91.74 | 4552 | 193 | 6  | N | 011-201 | GST | CTP-SMTMN |
| 267 | MS3533 | 31.59 | 91.79 | 4539 | 194 | 3  | N | 011-201 | GST | CTP-SMTMN |
| 268 | MS3545 | 31.57 | 91.91 | 4671 | 174 | 3  | N | 2011    | GST | CTP-SMTMN |
| 269 | MS3552 | 31.55 | 91.98 | 4574 | 5   | 5  | N | 011-201 | GST | CTP-SMTMN |
| 270 | MS3559 | 31.53 | 92.05 | 4516 | 157 | 8  | N | 011-201 | GST | CTP-SMTMN |
| 271 | MS3576 | 31.41 | 91.97 | 4517 | 104 | 7  | N | 011-201 | GST | CTP-SMTMN |
| 272 | MS3593 | 31.30 | 91.85 | 4574 | 26  | 13 | N | 011-201 | GST | CTP-SMTMN |
| 273 | MS3603 | 31.26 | 91.80 | 4630 | 142 | 4  | N | 011-201 | GST | CTP-SMTMN |
| 274 | MS3614 | 31.17 | 91.76 | 4633 | 34  | 4  | N | 011-201 | GST | CTP-SMTMN |
| 275 | MS3620 | 31.13 | 91.73 | 4765 | 124 | 2  | N | 011-201 | GST | CTP-SMTMN |
| 276 | MS3627 | 31.09 | 91.69 | 4736 | 247 | 5  | N | 011-201 | GST | CTP-SMTMN |
| 277 | MS3633 | 31.03 | 91.68 | 4675 | 289 | 8  | N | 011-201 | GST | CTP-SMTMN |
| 278 | MSBJ   | 31.37 | 91.90 | 4505 | 232 | 2  | N | 011-201 | GST | CTP-SMTMN |

|     |                |       |        |      |     |    |   |            |     |                        |
|-----|----------------|-------|--------|------|-----|----|---|------------|-----|------------------------|
| 279 | MSNQRW         | 31.46 | 92.02  | 4537 | 271 | 4  | N | 012-201    | GST | CTP-SMTMN              |
| 280 | P1             | 31.78 | 91.73  | 4730 | 70  | 9  | N | 012-201    | GST | CTP-SMTMN              |
| 281 | P10            | 31.81 | 91.85  | 4804 | 189 | 8  | N | 2013       | GST | CTP-SMTMN              |
| 282 | P2             | 31.74 | 91.73  | 4677 | 140 | 8  | N | 012-201    | GST | CTP-SMTMN              |
| 283 | P3             | 31.69 | 91.72  | 4600 | 115 | 4  | N | 012-201    | GST | CTP-SMTMN              |
| 284 | P5             | 31.61 | 91.91  | 4780 | 241 | 13 | N | 012-201    | GST | CTP-SMTMN              |
| 285 | P7             | 31.67 | 91.90  | 4737 | 204 | 14 | N | 012-201    | GST | CTP-SMTMN              |
| 286 | P8             | 31.74 | 91.87  | 4665 | 292 | 2  | N | 012-201    | GST | CTP-SMTMN              |
| 287 | Chumaerhe      | 35.37 | 93.45  | 4492 | 174 | 4  | Y | 2008       | BH  | GTN-P Borehole Data    |
| 288 | ChumarRiver    | 35.18 | 93.95  | 4443 | 176 | 1  | Y | 2009       | BH  | GTN-P Borehole Data    |
| 289 | ecologyStation | 34.73 | 92.88  | 4777 | 130 | 3  | Y | NA         | BH  | TN-P Active Layer Data |
| 290 | fenghuoShan    | 34.33 | 97.87  | 4649 | 193 | 15 | Y | NA         | BH  | TN-P Active Layer Data |
| 291 | kunlunBasin    | 35.62 | 94.07  | 4732 | 5   | 9  | Y | NA         | BH  | TN-P Active Layer Data |
| 292 | lowerTwoRiver  | 34.47 | 92.73  | 4571 | 190 | 5  | Y | NA         | BH  | GTN-P Borehole Data    |
| 293 | QTB02          | 35.63 | 94.06  | 4753 | 155 | 21 | Y | 2008       | BH  | GTN-P Borehole Data    |
| 294 | QTB03          | 35.52 | 93.78  | 4560 | 239 | 6  | Y | 2008       | BH  | GTN-P Borehole Data    |
| 295 | QTB04          | 35.43 | 93.60  | 4488 | 132 | 6  | Y | 2008       | BH  | GTN-P Borehole Data    |
| 296 | QTB05          | 35.36 | 93.45  | 4520 | 316 | 2  | Y | 2008       | BH  | GTN-P Borehole Data    |
| 297 | QTB06          | 35.29 | 93.27  | 4563 | 139 | 12 | Y | 2008       | BH  | GTN-P Borehole Data    |
| 298 | QTB07          | 35.19 | 93.07  | 4656 | 175 | 1  | Y | 2008       | BH  | GTN-P Borehole Data    |
| 299 | QTB09          | 35.13 | 93.03  | 4740 | 60  | 8  | Y | 2008       | BH  | GTN-P Borehole Data    |
| 300 | QTB11          | 34.39 | 92.66  | 4623 | 110 | 4  | Y | 2008       | BH  | GTN-P Borehole Data    |
| 301 | QTB15          | 33.10 | 91.90  | 4960 | 39  | 6  | Y | 2008       | BH  | GTN-P Borehole Data    |
| 302 | QTB16          | 33.07 | 91.94  | 5100 | 191 | 5  | Y | 2008       | BH  | GTN-P Borehole Data    |
| 303 | QTB18          | 31.82 | 91.74  | 4808 | 232 | 7  | Y | 2008       | BH  | GTN-P Borehole Data    |
| 304 | QumaRiver      | 34.90 | 94.79  | 4447 | 215 | 9  | Y | NA         | BH  | GTN-P Borehole Data    |
| 305 | Tianshuihal    | 35.41 | 79.55  | 4847 | 268 | 2  | Y | 2006       | BH  | GTN-P Borehole Data    |
| 306 | TP_1D_CM2      | 35.40 | 93.53  | 4482 | 164 | 4  | Y | 2008       | BH  | GTN-P Borehole Data    |
| 307 | TP_1S_CM2      | 35.40 | 93.53  | 4482 | 164 | 4  | Y | NA         | BH  | GTN-P Borehole Data    |
| 308 | TP_2D          | 35.62 | 94.05  | 4759 | 91  | 7  | Y | after 2005 | BH  | GTN-P Borehole Data    |
| 309 | TP_2S          | 35.13 | 93.04  | 4707 | 62  | 5  | Y | after 1995 | BH  | GTN-P Borehole Data    |
| 310 | TP_3D          | 35.55 | 93.96  | 4635 | 229 | 3  | Y | 2008       | BH  | GTN-P Borehole Data    |
| 311 | TP_3S_FH1      | 34.69 | 92.89  | 4938 | 137 | 19 | Y | 2008       | BH  | GTN-P Borehole Data    |
| 312 | TP_4D          | 35.36 | 93.45  | 4520 | 324 | 2  | Y | 2008       | BH  | GTN-P Borehole Data    |
| 313 | TP_4S_TGI      | 32.71 | 91.87  | 4997 | 341 | 4  | Y | after 1995 | BH  | GTN-P Borehole Data    |
| 314 | TP_5D          | 35.14 | 93.04  | 4764 | 275 | 32 | Y | 2008       | BH  | GTN-P Borehole Data    |
| 315 | TP_5S          | 32.49 | 91.82  | 4873 | 69  | 3  | Y | after 1995 | BH  | GTN-P Borehole Data    |
| 316 | TP_6D          | 34.01 | 92.34  | 4676 | 59  | 5  | Y | 2008       | BH  | GTN-P Borehole Data    |
| 317 | TP_6S_AD1      | 32.38 | 91.71  | 4786 | 111 | 4  | Y | after 1995 | BH  | GTN-P Borehole Data    |
| 318 | TP_7D          | 33.96 | 92.34  | 4676 | 323 | 12 | Y | after 2005 | BH  | GTN-P Borehole Data    |
| 319 | TP_8D          | 33.85 | 92.35  | 4614 | 340 | 7  | Y | 2008       | BH  | GTN-P Borehole Data    |
| 320 | TP_9D          | 33.01 | 91.66  | 5070 | 336 | 6  | Y | 2008       | BH  | GTN-P Borehole Data    |
| 321 | upperTwoRiver  | 31.82 | 91.73  | 4788 | 34  | 8  | Y | NA         | BH  | TN-P Active Layer Data |
| 322 | wuli           | 35.43 | 93.60  | 4461 | 324 | 7  | Y | NA         | BH  | TN-P Active Layer Data |
| 323 | XDTGT          | 35.72 | 94.13  | 4530 | 137 | 3  | Y | 2008       | BH  | GTN-P Borehole Data    |
| 324 | Zuimatan       | 35.36 | 99.13  | 4187 | 261 | 2  | Y | 2009       | BH  | GTN-P Borehole Data    |
| 325 | ar_sunny       | 38.09 | 100.52 | 3529 | 251 | 3  | N | 2014       | GST | HiWATER                |

|     |          |       |        |      |     |    |   |         |     |              |
|-----|----------|-------|--------|------|-----|----|---|---------|-----|--------------|
| 326 | Arou     | 38.05 | 100.46 | 2995 | 346 | 1  | N | 008-200 | GST | HiWATER      |
| 327 | bg       | 38.07 | 100.22 | 3449 | 346 | 5  | N | 2009    | GST | HiWATER      |
| 328 | dds      | 38.01 | 100.24 | 4147 | 145 | 6  | Y | 2008    | GST | HiWATER      |
| 329 | dyk_gt   | 38.53 | 100.25 | 2835 | 338 | 15 | N | 008-200 | GST | HiWATER      |
| 330 | eb       | 37.95 | 100.92 | 3294 | 197 | 1  | N | 2014    | GST | HiWATER      |
| 331 | hcg      | 38.00 | 100.73 | 3137 | 263 | 4  | N | 2014    | GST | HiWATER      |
| 332 | hlg_base | 38.27 | 99.88  | 2980 | 81  | 1  | N | 011-201 | GST | HiWATER      |
| 333 | hzs      | 38.23 | 100.19 | 2612 | 308 | 2  | N | 2014    | GST | HiWATER      |
| 334 | jyl      | 37.84 | 101.12 | 3750 | 225 | 7  | Y | 014-201 | GST | HiWATER      |
| 335 | k3       | 34.98 | 97.80  | 4272 | 90  | 0  | N | NA      | BH  | jin2010jgg   |
| 336 | k8       | 34.87 | 98.17  | 4211 | 84  | 8  | N | NA      | BH  | jin2010jgg   |
| 337 | syr7     | 34.93 | 98.22  | 4280 | 227 | 11 | N | NA      | BH  | jin2010jgg   |
| 338 | zk4      | 34.00 | 98.05  | 4220 | 201 | 12 | N | NA      | BH  | jin2010jgg   |
| 339 | BSK      | 34.13 | 97.66  | 4833 | 198 | 9  | Y | 2010    | BH  | jin2012sgs   |
| 340 | BSKN     | 34.11 | 97.65  | 4754 | 180 | 5  | Y | 2010    | BH  | jin2012sgs   |
| 341 | CLP-1    | 34.26 | 97.85  | 4727 | 107 | 10 | Y | 2010    | BH  | jin2012sgs   |
| 342 | CLP-2    | 34.26 | 97.85  | 4723 | 158 | 3  | Y | 2010    | BH  | jin2012sgs   |
| 343 | CLP-3    | 34.27 | 97.87  | 4663 | 3   | 4  | Y | 2010    | BH  | jin2012sgs   |
| 344 | CLP-4    | 34.31 | 97.90  | 4564 | 166 | 4  | Y | 2010    | BH  | jin2012sgs   |
| 345 | k1       | 34.90 | 96.33  | 4583 | 215 | 6  | Y | 1988    | BH  | jin2012sgs   |
| 346 | k10      | 34.02 | 98.13  | 4294 | 103 | 4  | Y | 1988    | BH  | jin2012sgs   |
| 347 | k14      | 34.90 | 98.18  | 4221 | 295 | 11 | Y | 1988    | BH  | jin2012sgs   |
| 348 | k2       | 34.88 | 96.33  | 4507 | 116 | 10 | Y | 1988    | BH  | jin2012sgs   |
| 349 | k4       | 34.73 | 96.15  | 4557 | 60  | 8  | Y | 1988    | BH  | jin2012sgs   |
| 350 | K445     | 34.97 | 98.55  | 4288 | 193 | 7  | Y | 2010    | BH  | jin2012sgs   |
| 351 | k5       | 34.72 | 96.15  | 4569 | 220 | 1  | Y | 1988    | BH  | jin2012sgs   |
| 352 | MDB      | 34.85 | 98.55  | 4225 | 207 | 3  | Y | 1988    | BH  | jin2012sgs   |
| 353 | syr10    | 34.82 | 98.37  | 4218 | 128 | 4  | Y | 1988    | BH  | jin2012sgs   |
| 354 | syr5     | 35.07 | 98.08  | 4239 | 354 | 2  | Y | 1988    | BH  | jin2012sgs   |
| 355 | syr8     | 34.92 | 98.52  | 4253 | 44  | 1  | Y | 1988    | BH  | jin2012sgs   |
| 356 | syr9     | 34.83 | 98.13  | 4216 | 97  | 6  | Y | 1988    | BH  | jin2012sgs   |
| 357 | XXH-1    | 34.65 | 98.44  | 4231 | 162 | 13 | N | 2010    | BH  | jin2012sgs   |
| 358 | YNG-1    | 34.40 | 97.95  | 4452 | 61  | 7  | Y | 2010    | BH  | jin2012sgs   |
| 359 | YNG-2    | 34.44 | 97.94  | 4395 | 237 | 4  | N | 2010    | BH  | jin2012sgs   |
| 360 | YNG-3    | 34.50 | 97.97  | 4333 | 280 | 4  | N | 2010    | BH  | jin2012sgs   |
| 361 | zk5      | 34.88 | 98.18  | 4220 | 14  | 5  | Y | 1988    | BH  | jin2012sgs   |
| 362 | zk6      | 35.10 | 97.77  | 4272 | 22  | 1  | Y | 1988    | BH  | jin2012sgs   |
| 363 | zk7      | 35.20 | 97.72  | 4472 | 247 | 9  | Y | 1988    | BH  | jin2012sgs   |
| 364 | zk8803   | 35.17 | 97.70  | 4400 | 266 | 3  | Y | 1988    | BH  | jin2012sgs   |
| 365 | zk8804   | 35.02 | 97.70  | 4275 | 90  | 0  | Y | 1988    | BH  | jin2012sgs   |
| 366 | zk8805   | 35.13 | 97.75  | 4300 | 140 | 2  | Y | 1988    | BH  | jin2012sgs   |
| 367 | CLQ-1    | 34.04 | 97.56  | 4642 | 107 | 8  | Y | 2010    | BH  | IdlPhdThesis |
| 368 | CLQ-2    | 34.04 | 97.57  | 4614 | 210 | 6  | Y | 2010    | BH  | IdlPhdThesis |
| 369 | K634-1   | 33.98 | 97.38  | 4532 | 241 | 3  | Y | 2010    | BH  | IdlPhdThesis |
| 370 | K634-2   | 33.98 | 97.38  | 4540 | 260 | 5  | Y | 2010    | BH  | IdlPhdThesis |
| 371 | QSH-1    | 33.78 | 97.15  | 4413 | 352 | 5  | Y | 2010    | BH  | IdlPhdThesis |
| 372 | QSH-2    | 33.74 | 97.17  | 4395 | 342 | 2  | N | 2010    | BH  | IdlPhdThesis |



|     |              |       |        |      |     |    |   |         |     |              |
|-----|--------------|-------|--------|------|-----|----|---|---------|-----|--------------|
| 373 | QSH--3       | 33.74 | 97.15  | 4435 | 108 | 5  | N | 2010    | BH  | IdlPhdThesis |
| 374 | wldBasin     | 35.20 | 93.09  | 4629 | 25  | 10 | Y | 2013    | BH  | lin2015ppp   |
| 375 | ZK34         | 33.07 | 84.16  | 4729 | 277 | 2  | Y | NA      | BH  | liu2016jgg   |
| 376 | ZK35         | 33.06 | 84.15  | 4750 | 358 | 2  | Y | NA      | BH  | liu2016jgg   |
| 377 | ZK36         | 33.05 | 84.15  | 4737 | 188 | 5  | Y | NA      | BH  | liu2016jgg   |
| 378 | ZK40         | 33.02 | 84.21  | 4995 | 8   | 6  | Y | NA      | BH  | liu2016jgg   |
| 379 | ZK44         | 33.18 | 85.31  | 5112 | 114 | 8  | Y | NA      | BH  | liu2016jgg   |
| 380 | ZK45         | 33.21 | 85.34  | 5196 | 211 | 4  | Y | NA      | BH  | liu2016jgg   |
| 381 | ZK46         | 33.39 | 85.63  | 5107 | 180 | 2  | Y | NA      | BH  | liu2016jgg   |
| 382 | ZK47         | 33.39 | 85.63  | 5102 | 180 | 2  | Y | NA      | BH  | liu2016jgg   |
| 383 | ZK48         | 33.39 | 85.63  | 5104 | 180 | 2  | Y | NA      | BH  | liu2016jgg   |
| 384 | ZK49         | 33.39 | 85.36  | 5232 | 325 | 4  | Y | NA      | BH  | liu2016jgg   |
| 385 | ZK50         | 33.35 | 85.65  | 5037 | 218 | 3  | Y | NA      | BH  | liu2016jgg   |
| 386 | ZK52         | 33.80 | 85.13  | 4990 | 178 | 3  | Y | NA      | BH  | liu2016jgg   |
| 387 | ZK53         | 33.39 | 85.63  | 5095 | 180 | 2  | Y | NA      | BH  | liu2016jgg   |
| 388 | anduo        | 32.35 | 91.10  | 4697 | 169 | 5  | N | NA      | BH  | pang2006jgg  |
| 389 | beiluhe      | 34.82 | 92.92  | 4645 | 310 | 11 | Y | NA      | BH  | pang2006jgg  |
| 390 | dangxiong    | 30.48 | 91.10  | 4292 | 32  | 5  | N | NA      | BH  | pang2006jgg  |
| 391 | dari         | 33.75 | 99.65  | 3984 | 20  | 2  | N | NA      | BH  | pang2006jgg  |
| 392 | gangcha      | 37.33 | 100.10 | 3295 | 212 | 6  | N | NA      | BH  | pang2006jgg  |
| 393 | kaixinling   | 33.96 | 92.34  | 4586 | 323 | 12 | Y | NA      | BH  | pang2006jgg  |
| 394 | kekexili     | 35.10 | 93.10  | 4813 | 124 | 9  | Y | NA      | BH  | pang2006jgg  |
| 395 | kunlunshan   | 35.62 | 94.07  | 4742 | 4   | 3  | Y | NA      | BH  | pang2006jgg  |
| 396 | maduo        | 34.92 | 98.22  | 4286 | 305 | 4  | N | NA      | BH  | pang2006jgg  |
| 397 | naqu         | 31.48 | 92.07  | 4532 | 234 | 5  | N | NA      | BH  | pang2006jgg  |
| 398 | qumalai      | 34.13 | 95.78  | 4161 | 339 | 3  | N | NA      | BH  | pang2006jgg  |
| 399 | shiqu        | 32.98 | 98.10  | 4191 | 88  | 6  | N | NA      | BH  | pang2006jgg  |
| 400 | suoxian      | 31.88 | 93.78  | 4073 | 170 | 5  | N | NA      | BH  | pang2006jgg  |
| 401 | tongtianhe   | 33.77 | 92.24  | 4646 | 55  | 1  | Y | NA      | BH  | pang2006jgg  |
| 402 | wuli         | 34.00 | 92.67  | 4532 | 114 | 2  | Y | NA      | BH  | pang2006jgg  |
| 403 | yushu        | 33.02 | 97.02  | 3935 | 111 | 31 | N | NA      | BH  | pang2006jgg  |
| 404 | zaduo        | 32.90 | 95.30  | 4198 | 191 | 32 | N | NA      | BH  | pang2006jgg  |
| 405 | MASWE-3650   | 38.41 | 75.06  | 3650 | 170 | 1  | N | 013-201 | TO  | TPEDB        |
| 406 | Southeastern | 29.77 | 94.74  | 3326 | 61  | 2  | N | 007-201 | TO  | TPEDB        |
| 407 | BLHS         | 34.86 | 92.94  | 4659 | 194 | 4  | Y | 2009    | BH  | syc2016tcd   |
| 408 | ALi02        | 33.45 | 79.62  | 4266 | 189 | 6  | N | 011-201 | GST | Tibet-OBS    |
| 409 | ALi03        | 33.45 | 79.62  | 4261 | 189 | 6  | N | 011-201 | GST | Tibet-OBS    |
| 410 | CST01        | 33.88 | 102.13 | 3431 | 322 | 3  | N | 009-201 | GST | Tibet-OBS    |
| 411 | CST03        | 33.90 | 101.97 | 3507 | 62  | 2  | N | 011-201 | GST | Tibet-OBS    |
| 412 | CST04        | 33.77 | 101.72 | 3504 | 193 | 1  | N | 011-201 | GST | Tibet-OBS    |
| 413 | CST05        | 33.67 | 101.88 | 3542 | 26  | 18 | N | 011-201 | GST | Tibet-OBS    |
| 414 | NST01        | 33.88 | 102.13 | 3431 | 322 | 3  | N | 011-201 | GST | Tibet-OBS    |
| 415 | NST02        | 33.88 | 102.13 | 3434 | 322 | 3  | N | 2011    | GST | Tibet-OBS    |
| 416 | NST03        | 33.77 | 102.13 | 3513 | 66  | 5  | N | 011-201 | GST | Tibet-OBS    |
| 417 | NST04        | 33.62 | 102.05 | 3448 | 200 | 2  | N | 011-201 | GST | Tibet-OBS    |
| 418 | NST05        | 33.63 | 102.05 | 3476 | 232 | 3  | N | 011-201 | GST | Tibet-OBS    |
| 419 | NST06        | 34.00 | 102.27 | 3428 | 281 | 7  | N | 011-201 | GST | Tibet-OBS    |

|     |                 |       |        |      |     |    |   |         |     |                       |
|-----|-----------------|-------|--------|------|-----|----|---|---------|-----|-----------------------|
| 420 | NST07           | 33.98 | 102.35 | 3430 | 252 | 1  | N | 011-201 | GST | Tibet-OBS             |
| 421 | NST08           | 33.97 | 102.60 | 3473 | 58  | 7  | N | 2012    | GST | Tibet-OBS             |
| 422 | NST09           | 33.90 | 102.55 | 3434 | 65  | 5  | N | 011-201 | GST | Tibet-OBS             |
| 423 | NST11           | 33.68 | 102.47 | 3442 | 8   | 5  | N | 2011    | GST | Tibet-OBS             |
| 424 | NST13           | 34.02 | 101.93 | 3519 | 200 | 2  | N | 011-201 | GST | Tibet-OBS             |
| 425 | NST14           | 33.92 | 102.12 | 3432 | 275 | 3  | N | 011-201 | GST | Tibet-OBS             |
| 426 | SQ01            | 32.48 | 80.07  | 4306 | 249 | 4  | N | 2011    | GST | Tibet-OBS             |
| 427 | SQ02            | 32.50 | 80.02  | 4304 | 349 | 4  | N | 2011    | GST | Tibet-OBS             |
| 428 | SQ03            | 32.50 | 79.97  | 4278 | 114 | 4  | N | 2011    | GST | Tibet-OBS             |
| 429 | SQ04            | 32.50 | 79.95  | 4269 | 33  | 6  | N | 2011    | GST | Tibet-OBS             |
| 430 | SQ05            | 32.50 | 79.92  | 4261 | 123 | 6  | N | 2011    | GST | Tibet-OBS             |
| 431 | SQ06            | 32.50 | 79.87  | 4257 | 149 | 5  | N | 2011    | GST | Tibet-OBS             |
| 432 | SQ07            | 32.52 | 79.83  | 4280 | 91  | 3  | N | 2011    | GST | Tibet-OBS             |
| 433 | SQ09            | 32.45 | 80.05  | 4275 | 288 | 5  | N | 2011    | GST | Tibet-OBS             |
| 434 | SQ10            | 32.42 | 80.00  | 4275 | 89  | 4  | N | 2012    | GST | Tibet-OBS             |
| 435 | SQ11            | 32.45 | 79.97  | 4274 | 334 | 25 | N | 011-201 | GST | Tibet-OBS             |
| 436 | SQ12            | 32.45 | 79.93  | 4264 | 298 | 14 | N | 2011    | GST | Tibet-OBS             |
| 437 | SQ14            | 32.45 | 80.17  | 4368 | 40  | 1  | N | 011-201 | GST | Tibet-OBS             |
| 438 | SQ16            | 32.43 | 80.07  | 4288 | 192 | 2  | N | 2012    | GST | Tibet-OBS             |
| 439 | Beiluhe_tp      | 34.82 | 92.92  | 4656 | 310 | 11 | Y | NA      | BH  | TPEDB                 |
| 440 | kaixinling_tp   | 33.95 | 92.40  | 4652 | 329 | 0  | Y | NA      | BH  | TPEDB                 |
| 441 | Kekexili_tp     | 35.15 | 93.05  | 4734 | 158 | 3  | Y | NA      | BH  | TPEDB                 |
| 442 | tanggula_tp     | 32.97 | 91.02  | 5100 | 5   | 3  | Y | NA      | BH  | TPEDB                 |
| 443 | tongtianhe_tp   | 33.58 | 92.87  | 4650 | 83  | 8  | Y | NA      | BH  | TPEDB                 |
| 444 | QTB01           | 35.72 | 94.08  | 4530 | 25  | 2  | Y | 2008    | BH  | SP Borehole Inventory |
| 445 | slheco          | 38.42 | 98.32  | 3885 | 44  | 4  | Y | 2008    | SP  | wang2011jgg           |
| 446 | PT1             | 38.8  | 98.75  | 4128 | 27  | 6  | Y | 2018    | BH  | cao2018jgr            |
| 447 | PT2             | 38.83 | 98.78  | 3985 | 10  | 4  | Y | 2018    | BH  | cao2018jgr            |
| 448 | PT3             | 38.84 | 98.85  | 3827 | 301 | 2  | Y | 2018    | BH  | cao2018jgr            |
| 449 | PT4             | 38.83 | 98.95  | 3770 | 89  | 5  | Y | 2018    | BH  | cao2018jgr            |
| 450 | PT5             | 38.81 | 99.03  | 3691 | 229 | 3  | Y | 2018    | BH  | cao2018jgr            |
| 451 | PT6             | 38.95 | 98.96  | 4153 | 115 | 13 | Y | 2018    | BH  | cao2018jgr            |
| 452 | PT7             | 38.90 | 98.96  | 3970 | 325 | 1  | Y | 2018    | BH  | cao2018jgr            |
| 453 | PT8             | 38.67 | 98.96  | 3886 | 76  | 8  | Y | 2018    | BH  | cao2018jgr            |
| 454 | PT9             | 98.95 | 38.63  | 4138 | 77  | 10 | Y | 2018    | BH  | cao2018jgr            |
| 455 | PT10            | 38.79 | 99.07  | 3681 | 183 | 2  | Y | 2011    | BH  | cao2018jgr            |
| 456 | SFGT            | 38.79 | 99.07  | 3680 | 183 | 2  | N | 2011    | BH  | cao2018jgr            |
| 457 | SFGT5           | 38.77 | 99.08  | 3642 | 203 | 3  | N | 2011    | BH  | cao2018jgr            |
| 458 | SFGT6           | 38.75 | 99.13  | 3609 | 224 | 4  | N | 2011    | BH  | cao2018jgr            |
| 459 | beiluhe         | 34.85 | 92.93  | 4628 | 25  | 7  | Y | 2002    | BH  | wj2010                |
| 460 | fenghuoshan2    | 34.68 | 92.90  | 5100 | 31  | 5  | Y | 2002    | BH  | wj2010                |
| 461 | kaixinling      | 34.10 | 92.35  | 4742 | 247 | 0  | Y | 2003    | BH  | wj2010                |
| 462 | kunlunshan2     | 35.62 | 94.05  | 4772 | 233 | 6  | Y | 2001    | BH  | wj2010                |
| 463 | qingshuihe      | 35.45 | 93.63  | 4464 | 338 | 3  | Y | 2002    | BH  | wj2010                |
| 464 | wudaoliang      | 35.20 | 93.12  | 4613 | 1   | 4  | Y | 2003    | BH  | wj2010                |
| 465 | xidatan         | 35.72 | 94.10  | 4480 | 2   | 13 | Y | 2001    | BH  | wj2010                |
| 466 | jiangmen290-300 | 37.67 | 100.40 | 3695 | 114 | 2  | N | 2004    | BH  | wu2007ajgg            |

|     |              |       |        |      |     |    |   |         |    |            |
|-----|--------------|-------|--------|------|-----|----|---|---------|----|------------|
| 467 | reqik75-84   | 37.67 | 100.48 | 3755 | 146 | 11 | N | 2004    | BH | wu2007ajgg |
| 468 | tianmuk67-77 | 37.67 | 98.70  | 3685 | 5   | 17 | Y | 2004    | BH | wu2007ajgg |
| 469 | k121         | 38.03 | 98.93  | 4103 | 185 | 16 | Y | 2004    | BH | wu2007bjgg |
| 470 | k143         | 38.12 | 99.08  | 4034 | 240 | 3  | Y | 2004    | BH | wu2007bjgg |
| 471 | k189         | 38.07 | 99.45  | 3885 | 28  | 3  | Y | 2004    | BH | wu2007bjgg |
| 472 | k269         | 37.85 | 100.23 | 3566 | 343 | 7  | Y | 2004    | BH | wu2007bjgg |
| 473 | k289         | 37.73 | 100.33 | 4060 | 53  | 15 | Y | 2004    | BH | wu2007bjgg |
| 474 | K67          | 37.68 | 98.67  | 3680 | 173 | 24 | Y | 2004    | BH | wu2007bjgg |
| 475 | slh1         | 38.63 | 98.10  | 3729 | 187 | 6  | N | 2008    | BH | wu2008ags  |
| 476 | slh2         | 38.57 | 98.18  | 3787 | 302 | 9  | Y | 2008    | BH | wu2008ags  |
| 477 | slh3         | 38.55 | 98.20  | 3828 | 250 | 3  | Y | 2008    | BH | wu2008ags  |
| 478 | slh8_10      | 38.42 | 98.31  | 3890 | 80  | 1  | Y | 2008    | BH | wu2008ags  |
| 479 | AD1          | 32.38 | 91.71  | 4786 | 111 | 4  | Y | 998-200 | BH | wu2008jgr  |
| 480 | CM1          | 35.51 | 93.73  | 4552 | 17  | 4  | Y | 995-200 | BH | wu2008jgr  |
| 481 | CM2          | 35.40 | 93.53  | 4482 | 164 | 4  | Y | 995-200 | BH | wu2008jgr  |
| 482 | FH1          | 34.69 | 92.89  | 4938 | 137 | 19 | Y | 995-200 | BH | wu2008jgr  |
| 483 | TG1          | 32.71 | 91.87  | 4997 | 341 | 4  | Y | 998-200 | BH | wu2008jgr  |
| 484 | TM1          | 32.49 | 91.82  | 4873 | 69  | 3  | Y | 998-200 | BH | wu2008jgr  |
| 485 | WD1          | 35.23 | 93.09  | 4610 | 96  | 22 | Y | 995-200 | BH | wu2008jgr  |
| 486 | WD2          | 35.13 | 93.04  | 4707 | 62  | 5  | Y | 995-200 | BH | wu2008jgr  |
| 487 | AD2          | 32.31 | 91.58  | 4814 | 107 | 21 | Y | 2005    | BH | wu2012tc   |
| 488 | BD1          | 35.62 | 93.96  | 4636 | 179 | 16 | Y | NA      | BH | wu2012tc   |
| 489 | CM3          | 35.55 | 93.96  | 4547 | 0   | 6  | Y | 2004    | BH | wu2012tc   |
| 490 | CM5          | 35.36 | 93.45  | 4507 | 316 | 2  | Y | 2004    | BH | wu2012tc   |
| 491 | CM6          | 35.36 | 93.45  | 4504 | 316 | 2  | Y | 2004    | BH | wu2012tc   |
| 492 | CM7          | 35.28 | 93.22  | 4589 | 154 | 5  | Y | 2004    | BH | wu2012tc   |
| 493 | FH2          | 34.67 | 92.90  | 4894 | 100 | 19 | Y | 2005    | BH | wu2012tc   |
| 494 | FH3          | 34.61 | 92.78  | 4715 | 174 | 3  | Y | 2005    | BH | wu2012tc   |
| 495 | HR3          | 35.07 | 93.03  | 4675 | 108 | 25 | Y | 2008    | BH | wu2012tc   |
| 496 | KL1          | 34.01 | 92.34  | 4672 | 336 | 6  | Y | 2008    | BH | wu2012tc   |
| 497 | KL3          | 33.96 | 92.34  | 4622 | 66  | 7  | Y | 2008    | BH | wu2012tc   |
| 498 | KL5          | 33.94 | 92.34  | 4622 | 101 | 6  | Y | 2008    | BH | wu2012tc   |
| 499 | KM2          | 35.62 | 94.05  | 4757 | 272 | 22 | Y | NA      | BH | wu2012tc   |
| 500 | TG2          | 33.30 | 91.87  | 4841 | 48  | 4  | Y | 2008    | BH | wu2012tc   |
| 501 | TG3          | 33.09 | 91.80  | 4926 | 225 | 7  | Y | 2008    | BH | wu2012tc   |
| 502 | TG4          | 33.07 | 91.75  | 4974 | 117 | 1  | Y | 2008    | BH | wu2012tc   |
| 503 | TJ1          | 32.51 | 91.53  | 4868 | 290 | 7  | Y | NA      | BH | wu2012tc   |
| 504 | TJ2          | 32.39 | 91.62  | 4887 | 315 | 4  | Y | NA      | BH | wu2012tc   |
| 505 | TT1          | 33.88 | 92.23  | 4640 | 224 | 7  | Y | 2005    | BH | wu2012tc   |
| 506 | TT2          | 33.76 | 92.20  | 4647 | 96  | 2  | Y | 2005    | BH | wu2012tc   |
| 507 | WD3          | 35.20 | 93.11  | 4613 | 20  | 3  | Y | 2008    | BH | wu2012tc   |
| 508 | WD4          | 35.14 | 93.04  | 4734 | 37  | 4  | Y | 2008    | BH | wu2012tc   |
| 509 | WL1          | 34.48 | 92.73  | 4587 | 351 | 5  | Y | 2004    | BH | wu2012tc   |
| 510 | WQ1          | 33.47 | 91.94  | 4778 | 340 | 14 | Y | NA      | BH | wu2012tc   |
| 511 | WQ2          | 33.40 | 91.95  | 4817 | 116 | 3  | Y | NA      | BH | wu2012tc   |
| 512 | YM1          | 34.58 | 92.74  | 4654 | 265 | 8  | Y | NA      | BH | wu2012tc   |
| 513 | YM2          | 34.53 | 92.73  | 4616 | 7   | 5  | Y | NA      | BH | wu2012tc   |

|     |        |       |       |      |     |    |   |         |    |            |
|-----|--------|-------|-------|------|-----|----|---|---------|----|------------|
| 514 | BLR1   | 34.86 | 92.92 | 4633 | 37  | 3  | Y | 002-201 | BH | wu2016tc   |
| 515 | BLR2   | 34.85 | 92.94 | 4632 | 53  | 13 | Y | 002-201 | BH | wu2016tc   |
| 516 | BLR3   | 34.85 | 92.94 | 4630 | 53  | 13 | Y | 002-201 | BH | wu2016tc   |
| 517 | BLR4   | 34.82 | 92.92 | 4654 | 310 | 11 | Y | 002-201 | BH | wu2016tc   |
| 518 | CMH1   | 35.52 | 93.76 | 4577 | 336 | 4  | Y | 002-201 | BH | wu2016tc   |
| 519 | CMH2   | 35.52 | 93.76 | 4572 | 336 | 4  | Y | 002-201 | BH | wu2016tc   |
| 520 | CMH3   | 35.52 | 93.76 | 4568 | 336 | 4  | Y | 002-201 | BH | wu2016tc   |
| 521 | CMR1   | 35.41 | 93.57 | 4477 | 143 | 9  | Y | 005-201 | BH | wu2016tc   |
| 522 | CMR2   | 35.28 | 93.22 | 4583 | 64  | 3  | Y | 005-201 | BH | wu2016tc   |
| 523 | FHH1   | 34.68 | 92.92 | 4950 | 295 | 6  | Y | 996-201 | BH | wu2016tc   |
| 524 | KXH1   | 33.96 | 92.35 | 4627 | 244 | 21 | Y | 003-201 | BH | wu2016tc   |
| 525 | TGH1   | 33.10 | 91.90 | 4948 | 244 | 8  | Y | 002-201 | BH | wu2016tc   |
| 526 | blh    | 35.48 | 93.58 | 4635 | 116 | 2  | Y | 2013    | SP | yue2015jgg |
| 527 | fhs    | 34.73 | 92.90 | 4896 | 310 | 1  | Y | 2013    | SP | yue2015jgg |
| 528 | kkxl   | 35.22 | 93.05 | 4740 | 264 | 4  | Y | 2013    | SP | yue2015jgg |
| 529 | tglsyk | 33.07 | 91.93 | 5100 | 237 | 2  | Y | 2013    | SP | yue2015jgg |
| 530 | zl1    | 35.73 | 79.46 | 4952 | 224 | 2  | Y | NA      | BH | zou2017tc  |
| 531 | zl10   | 35.73 | 79.45 | 4946 | 68  | 6  | Y | NA      | BH | zou2017tc  |
| 532 | zl11   | 33.07 | 84.15 | 4729 | 336 | 7  | Y | NA      | BH | zou2017tc  |
| 533 | zl12   | 33.07 | 84.15 | 4750 | 119 | 1  | Y | NA      | BH | zou2017tc  |
| 534 | zl13   | 33.05 | 84.16 | 4737 | 230 | 4  | Y | NA      | BH | zou2017tc  |
| 535 | zl14   | 33.02 | 84.21 | 4995 | 20  | 14 | Y | NA      | BH | zou2017tc  |
| 536 | zl15   | 33.18 | 85.31 | 5112 | 118 | 3  | Y | NA      | BH | zou2017tc  |
| 537 | zl16   | 33.21 | 85.35 | 5196 | 197 | 6  | Y | NA      | BH | zou2017tc  |
| 538 | zl17   | 33.39 | 85.63 | 5107 | 125 | 4  | Y | NA      | BH | zou2017tc  |
| 539 | zl18   | 33.39 | 85.63 | 5102 | 132 | 3  | Y | NA      | BH | zou2017tc  |
| 540 | zl19   | 33.39 | 85.63 | 5104 | 254 | 1  | Y | NA      | BH | zou2017tc  |
| 541 | zl2    | 35.72 | 79.46 | 4960 | 311 | 4  | Y | NA      | BH | zou2017tc  |
| 542 | zl20   | 33.39 | 85.63 | 5105 | 276 | 5  | Y | NA      | BH | zou2017tc  |
| 543 | zl21   | 33.35 | 85.65 | 5037 | 335 | 1  | Y | NA      | BH | zou2017tc  |
| 544 | zl22   | 33.80 | 85.13 | 4990 | 209 | 11 | Y | NA      | BH | zou2017tc  |
| 545 | zl23   | 33.39 | 85.63 | 5095 | 155 | 4  | Y | NA      | BH | zou2017tc  |
| 546 | zl24   | 37.46 | 88.58 | 4800 | 173 | 7  | Y | NA      | BH | zou2017tc  |
| 547 | zl25   | 37.52 | 88.62 | 4651 | 329 | 2  | Y | NA      | BH | zou2017tc  |
| 548 | zl26   | 37.52 | 88.61 | 4645 | 111 | 4  | Y | NA      | BH | zou2017tc  |
| 549 | zl27   | 37.51 | 88.70 | 4500 | 163 | 3  | Y | NA      | BH | zou2017tc  |
| 550 | zl28   | 37.54 | 88.80 | 4300 | 57  | 5  | Y | NA      | BH | zou2017tc  |
| 551 | zl29   | 37.54 | 88.83 | 4250 | 191 | 4  | Y | NA      | BH | zou2017tc  |
| 552 | zl3    | 35.79 | 79.42 | 4928 | 281 | 5  | Y | NA      | BH | zou2017tc  |
| 553 | zl30   | 37.57 | 88.60 | 4584 | 156 | 2  | Y | NA      | BH | zou2017tc  |
| 554 | zl31   | 37.58 | 88.60 | 4500 | 289 | 18 | Y | NA      | BH | zou2017tc  |
| 555 | zl32   | 37.61 | 88.60 | 4400 | 317 | 12 | Y | NA      | BH | zou2017tc  |
| 556 | zl33   | 35.36 | 99.13 | 4193 | 261 | 2  | Y | NA      | BH | zou2017tc  |
| 557 | zl34   | 35.36 | 99.15 | 4161 | 72  | 2  | Y | NA      | BH | zou2017tc  |
| 558 | zl35   | 35.22 | 99.22 | 4275 | 227 | 19 | Y | NA      | BH | zou2017tc  |
| 559 | zl36   | 35.33 | 99.29 | 4488 | 51  | 3  | Y | NA      | BH | zou2017tc  |
| 560 | zl37   | 35.39 | 99.30 | 4395 | 314 | 7  | Y | NA      | BH | zou2017tc  |

|     |       |       |       |      |     |    |   |         |    |           |
|-----|-------|-------|-------|------|-----|----|---|---------|----|-----------|
| 561 | zl38  | 35.39 | 99.31 | 4465 | 154 | 1  | Y | NA      | BH | zou2017tc |
| 562 | zl39  | 35.39 | 99.31 | 4460 | 264 | 8  | Y | NA      | BH | zou2017tc |
| 563 | zl4   | 35.72 | 79.37 | 4782 | 28  | 2  | Y | NA      | BH | zou2017tc |
| 564 | zl40  | 35.48 | 99.40 | 4667 | 351 | 20 | Y | NA      | BH | zou2017tc |
| 565 | zl41  | 35.48 | 99.50 | 4311 | 294 | 5  | Y | NA      | BH | zou2017tc |
| 566 | zl42  | 35.40 | 99.56 | 4602 | 165 | 6  | Y | NA      | BH | zou2017tc |
| 567 | zl43  | 35.86 | 79.37 | 4583 | 165 | 4  | N | NA      | BH | zou2017tc |
| 568 | zl44  | 35.91 | 79.23 | 4284 | 44  | 5  | N | NA      | BH | zou2017tc |
| 569 | zl45  | 35.90 | 79.16 | 4505 | 315 | 46 | N | NA      | BH | zou2017tc |
| 570 | zl46  | 35.80 | 79.03 | 4642 | 326 | 8  | N | NA      | BH | zou2017tc |
| 571 | zl47  | 35.80 | 79.03 | 4627 | 311 | 5  | N | NA      | BH | zou2017tc |
| 572 | zl48  | 32.95 | 84.04 | 4729 | 68  | 17 | N | NA      | BH | zou2017tc |
| 573 | zl49  | 32.91 | 84.07 | 4804 | 120 | 4  | N | NA      | BH | zou2017tc |
| 574 | zl5   | 35.76 | 79.38 | 4845 | 40  | 5  | Y | NA      | BH | zou2017tc |
| 575 | zl50  | 33.00 | 84.16 | 4786 | 286 | 1  | N | NA      | BH | zou2017tc |
| 576 | zl51  | 33.00 | 84.18 | 4919 | 286 | 13 | N | NA      | BH | zou2017tc |
| 577 | zl52  | 33.32 | 84.26 | 4553 | 306 | 7  | N | NA      | BH | zou2017tc |
| 578 | zl53  | 33.03 | 84.20 | 4870 | 317 | 2  | N | NA      | BH | zou2017tc |
| 579 | zl54  | 33.03 | 84.03 | 4645 | 256 | 4  | N | NA      | BH | zou2017tc |
| 580 | zl55  | 33.16 | 85.29 | 4972 | 333 | 4  | N | NA      | BH | zou2017tc |
| 581 | zl56  | 33.45 | 85.77 | 4895 | 133 | 5  | N | NA      | BH | zou2017tc |
| 582 | zl57  | 37.54 | 88.87 | 4200 | 250 | 2  | N | NA      | BH | zou2017tc |
| 583 | zl58  | 37.66 | 88.68 | 4280 | 280 | 6  | N | NA      | BH | zou2017tc |
| 584 | zl59  | 37.71 | 88.72 | 4200 | 23  | 5  | N | NA      | BH | zou2017tc |
| 585 | zl6   | 35.77 | 79.40 | 4846 | 123 | 1  | Y | NA      | BH | zou2017tc |
| 586 | zl60  | 37.75 | 88.72 | 4142 | 280 | 14 | N | NA      | BH | zou2017tc |
| 587 | zl61  | 35.37 | 99.15 | 4228 | 127 | 7  | N | NA      | BH | zou2017tc |
| 588 | zl62  | 35.40 | 99.33 | 4259 | 98  | 10 | N | NA      | BH | zou2017tc |
| 589 | zl7   | 35.86 | 79.39 | 4774 | 261 | 12 | Y | NA      | BH | zou2017tc |
| 590 | zl8   | 35.84 | 79.40 | 4872 | 358 | 6  | Y | NA      | BH | zou2017tc |
| 591 | zl9   | 35.80 | 79.41 | 4926 | 194 | 4  | Y | NA      | BH | zou2017tc |
| 592 | syr1  | 35.08 | 97.75 | 4283 | 90  | 0  | Y | 013-201 | BH | li2016sgs |
| 593 | syr10 | 35.02 | 97.57 | 4315 | 100 | 9  | N | 013-201 | BH | li2016sgs |
| 594 | syr11 | 35.02 | 97.57 | 4322 | 106 | 4  | Y | 013-201 | BH | li2016sgs |
| 595 | syr12 | 35.04 | 96.40 | 4433 | 335 | 4  | Y | 013-201 | BH | li2016sgs |
| 596 | syr13 | 34.90 | 96.23 | 4509 | 154 | 3  | Y | 013-201 | BH | li2016sgs |
| 597 | syr14 | 34.69 | 96.12 | 4616 | 194 | 3  | Y | 013-201 | BH | li2016sgs |
| 598 | syr15 | 34.93 | 96.20 | 4625 | 150 | 8  | Y | 013-201 | BH | li2016sgs |
| 599 | syr16 | 34.94 | 96.21 | 4699 | 141 | 9  | Y | 013-201 | BH | li2016sgs |
| 600 | syr17 | 34.80 | 97.43 | 4284 | 36  | 1  | N | 013-201 | BH | li2016sgs |
| 601 | syr18 | 34.79 | 97.42 | 4295 | 249 | 4  | N | 013-201 | BH | li2016sgs |
| 602 | syr19 | 34.72 | 97.33 | 4330 | 251 | 4  | N | 013-201 | BH | li2016sgs |
| 603 | syr2  | 35.11 | 97.77 | 4300 | 189 | 1  | Y | 013-201 | BH | li2016sgs |
| 604 | syr20 | 34.71 | 97.33 | 4315 | 327 | 2  | N | 013-201 | BH | li2016sgs |
| 605 | syr21 | 34.71 | 97.32 | 4324 | 254 | 3  | Y | 013-201 | BH | li2016sgs |
| 606 | syr22 | 34.70 | 97.32 | 4335 | 342 | 2  | Y | 013-201 | BH | li2016sgs |
| 607 | syr23 | 34.70 | 97.31 | 4336 | 88  | 6  | Y | 013-201 | BH | li2016sgs |

|     |       |       |       |      |     |    |   |         |    |           |
|-----|-------|-------|-------|------|-----|----|---|---------|----|-----------|
| 608 | syr24 | 34.69 | 97.32 | 4332 | 235 | 9  | N | 013–201 | BH | li2016sgs |
| 609 | syr25 | 34.69 | 97.31 | 4345 | 45  | 7  | N | 013–201 | BH | li2016sgs |
| 610 | syr26 | 34.69 | 97.32 | 4370 | 71  | 16 | N | 013–201 | BH | li2016sgs |
| 611 | syr27 | 34.69 | 97.31 | 4280 | 86  | 10 | Y | 013–201 | BH | li2016sgs |
| 612 | syr28 | 34.65 | 97.33 | 4404 | 63  | 4  | Y | 013–201 | BH | li2016sgs |
| 613 | syr29 | 34.65 | 97.32 | 4426 | 347 | 7  | Y | 013–201 | BH | li2016sgs |
| 614 | syr3  | 35.11 | 97.83 | 4285 | 316 | 3  | N | 013–201 | BH | li2016sgs |
| 615 | syr30 | 34.65 | 97.33 | 4422 | 355 | 4  | Y | 013–201 | BH | li2016sgs |
| 616 | syr31 | 34.65 | 97.32 | 4435 | 84  | 10 | N | 013–201 | BH | li2016sgs |
| 617 | syr32 | 35.07 | 96.75 | 4322 | 304 | 4  | Y | 013–201 | BH | li2016sgs |
| 618 | syr33 | 35.09 | 96.73 | 4331 | 60  | 3  | Y | 013–201 | BH | li2016sgs |
| 619 | syr34 | 35.10 | 96.70 | 4341 | 231 | 1  | Y | 013–201 | BH | li2016sgs |
| 620 | syr35 | 35.08 | 96.61 | 4291 | 15  | 3  | Y | 013–201 | BH | li2016sgs |
| 621 | syr4  | 35.02 | 97.58 | 4302 | 48  | 3  | Y | 013–201 | BH | li2016sgs |
| 622 | syr5  | 35.01 | 97.57 | 4302 | 174 | 1  | Y | 013–201 | BH | li2016sgs |
| 623 | syr6  | 35.02 | 97.57 | 4302 | 99  | 8  | N | 013–201 | BH | li2016sgs |
| 624 | syr7  | 35.02 | 97.58 | 4314 | 258 | 6  | N | 013–201 | BH | li2016sgs |
| 625 | syr8  | 35.02 | 97.59 | 4345 | 175 | 9  | Y | 013–201 | BH | li2016sgs |
| 626 | syr9  | 35.02 | 97.59 | 4269 | 12  | 11 | N | 013–201 | BH | li2016sgs |

**Note:** Lat = latitude [°]; Lon = longitude [°]; Ele = elevation [m], ASP = slope aspect [°], Slp = slope [°], PFYN= presence (Y) or absence (N), Year = year of data measured, Method = method of evidence measured, ReferenceID = reference of data from. The full reference name could be found in the "PFInventoryReference".
